# Supplementary material for: Application of Piezo-Based Measuring System for Evaluation of Nucleic Acid-Based Drugs Influencing the Coagulation
Source: MDPI journal article supplement (doi:10.3390/s20010152), 2019-12-25
Supplement: s1 [file s1]

# Supplementary

## Application of Piezo-Based Measuring System for Evaluation of Nucleic Acid-Based Drugs Influencing the Coagulation

Silju-John Kunnakattu <sup>1,2</sup>, Ludmilla Hann <sup>1</sup>, Julia Kurz <sup>1</sup>, Hanna Haag <sup>1</sup>, Stefan Fennrich <sup>1</sup>, Nicole Rauch <sup>2</sup>, Christian Schlensak <sup>1</sup>, Hans Peter Wendel <sup>1</sup>, Sandra Stoppelkamp <sup>1,†</sup>, and Meltem Avci-Adali <sup>1,\*,†</sup>

<sup>1</sup> Department of Thoracic and Cardiovascular Surgery, University Hospital Tuebingen, 72076 Tuebingen, Germany; Silju.kunnakattu@klinikum.uni-tuebingen.de (S.-J.K.); Ludmilla.hann@klinikum.uni-tuebingen.de (L.H.); Julia.kurz@klinikum.uni-tuebingen.de (J.K.); Hanna.haag@klinikum.uni-tuebingen.de (H.H.); stefan.fennrich@gmail.com (S.F.); Christian.schlensak@med.uni-tuebingen.de (C.S.); Hans-peter.wendel@med.uni-tuebingen.de (H.P.W.); Sandra.stoppelkamp@klinikum.uni-tuebingen.de (S.S); meltem.avci-adali@uni-tuebingen.de (M.A.-A.)

<sup>2</sup> Department of Micro- and Nanoanalytics, University of Applied Sciences Iserlohn, 58644 Iserlohn, Germany; Rauch.nicole@fh-swf.de (N.R.)

\* Correspondence: meltem.avci-adali@uni-tuebingen.de ; Tel.: +49-7071-29-83334; Fax: + 49-7071-29-5369

† These authors contributed equally to this work.

### Supplementary Tables

**Table S1.** Citrated blood was incubated with NaCl or various concentrations of NU172 aptamer, AD, or NS\_AD for 2 min. Afterwards, the coagulation was activated by pathromtin and CaCl<sub>2</sub> (n = 10) and measured with PIEZ and KC 1A. Using PIEZ, the clotting time (CT), viscous ( $\eta'$ ) and elastic ( $\eta''$ ) components at 300 s, and linear slopes ( $m(\eta')$  and  $m(\eta'')$ ) were measured <sup>1</sup>.

| Sample                  | PIEZ         | KC 1A        | PIEZ                                        |                                             |                                             |                                             |
|-------------------------|--------------|--------------|---------------------------------------------|---------------------------------------------|---------------------------------------------|---------------------------------------------|
|                         | CT/s         | CT/s         | $\eta'$ (Pas) at 300 s                      | $\eta''$ (Pas) at 300 s                     | $m(\eta'/\text{Pa})$                        | $m(\eta''/\text{Pa})$                       |
| NaCl                    | 51.8 ± 1.3   | 52.9 ± 2.3   | $3.1 \times 10^{-3} \pm 3.8 \times 10^{-4}$ | $3.0 \times 10^{-3} \pm 3.9 \times 10^{-4}$ | $6.8 \times 10^{-5} \pm 1.2 \times 10^{-5}$ | $8.4 \times 10^{-5} \pm 1.2 \times 10^{-5}$ |
| 0.5 $\mu\text{M}$ NU172 | 62.2 ± 1.9   | 63.3 ± 4.0   | $3.7 \times 10^{-3} \pm 3.7 \times 10^{-4}$ | $3.4 \times 10^{-3} \pm 6.1 \times 10^{-4}$ | $7.8 \times 10^{-5} \pm 1.6 \times 10^{-5}$ | $6.8 \times 10^{-5} \pm 2.2 \times 10^{-5}$ |
| 1.0 $\mu\text{M}$ NU172 | 78.7 ± 3.1   | 79.4 ± 8.0   | $3.5 \times 10^{-3} \pm 2.6 \times 10^{-4}$ | $3.2 \times 10^{-3} \pm 3.8 \times 10^{-4}$ | $4.9 \times 10^{-5} \pm 1.3 \times 10^{-5}$ | $4.2 \times 10^{-5} \pm 2.2 \times 10^{-5}$ |
| 1.5 $\mu\text{M}$ NU172 | 215.0 ± 10.7 | 211.6 ± 10.4 | $2.5 \times 10^{-3} \pm 3.6 \times 10^{-4}$ | $1.6 \times 10^{-3} \pm 2.6 \times 10^{-4}$ | $1.1 \times 10^{-5} \pm 3.5 \times 10^{-6}$ | $1.4 \times 10^{-5} \pm 2.5 \times 10^{-6}$ |
| 2.0 $\mu\text{M}$ NU172 | 249.1 ± 10.5 | 248.9 ± 14.6 | $2.1 \times 10^{-3} \pm 2.8 \times 10^{-4}$ | $1.4 \times 10^{-3} \pm 2.4 \times 10^{-4}$ | $8.3 \times 10^{-6} \pm 3.1 \times 10^{-6}$ | $1.2 \times 10^{-5} \pm 2.5 \times 10^{-6}$ |
| 1.0 $\mu\text{M}$ AD    | 52.7 ± 1.1   | 52.4 ± 1.9   | $2.9 \times 10^{-3} \pm 2.0 \times 10^{-4}$ | $3.5 \times 10^{-3} \pm 4.6 \times 10^{-4}$ | $5.9 \times 10^{-5} \pm 6.7 \times 10^{-6}$ | $9.1 \times 10^{-5} \pm 1.2 \times 10^{-5}$ |
| 1.0 $\mu\text{M}$ NS_AD | 52.2 ± 1.6   | 51.8 ± 1.9   | $3.3 \times 10^{-3} \pm 2.8 \times 10^{-4}$ | $3.5 \times 10^{-3} \pm 4.1 \times 10^{-4}$ | $8.0 \times 10^{-5} \pm 1.0 \times 10^{-5}$ | $9.9 \times 10^{-5} \pm 2.7 \times 10^{-5}$ |
| 1.0 $\mu\text{M}$ NS    | 52.1 ± 1.6   | 51.8 ± 1.5   | $3.3 \times 10^{-3} \pm 2.9 \times 10^{-4}$ | $3.4 \times 10^{-3} \pm 4.0 \times 10^{-4}$ | $8.2 \times 10^{-5} \pm 1.2 \times 10^{-5}$ | $1.1 \times 10^{-4} \pm 2.4 \times 10^{-5}$ |

<sup>1</sup> clotting time (CT), viscous component ( $\eta'$ ), elastic component ( $\eta''$ ), the linear slope of the viscous or elastic component (m), thrombin aptamer (NU172), antidote (AD), nonsense antidote (NS\_AD), nonsense (NS).

**Table S2.** Citrated blood was incubated with NaCl or various concentrations of NU172 aptamer for 2 min. Then, 1.0  $\mu\text{M}$  AD was added and after 5 min the blood samples were activated with pathromtin and  $\text{CaCl}_2$ . (n = 5). The measurement was performed with PIEZ and KC 1A. Using PIEZ, the clotting time (CT), viscous ( $\eta'$ ) and elastic ( $\eta''$ ) components at 300 s, and linear slopes ( $m(\eta')$  and  $m(\eta'')$ ) were measured <sup>1</sup>.

| Sample                               | PIEZ            | KC 1A            | PIEZ                                        |                                             |                                             |                                             |
|--------------------------------------|-----------------|------------------|---------------------------------------------|---------------------------------------------|---------------------------------------------|---------------------------------------------|
|                                      | CT/s            | CT/s             | $\eta'$ (Pa s) at 300 s                     | $\eta''$ (Pa s) at 300 s                    | $m(\eta'/\text{Pa})$                        | $m(\eta''/\text{Pa})$                       |
| NaCl                                 | 58.6 $\pm$ 2.4  | 59.4 $\pm$ 2.5   | $3.3 \times 10^{-3} \pm 3.0 \times 10^{-4}$ | $3.6 \times 10^{-3} \pm 1.4 \times 10^{-4}$ | $7.2 \times 10^{-5} \pm 1.1 \times 10^{-5}$ | $8.6 \times 10^{-5} \pm 3.6 \times 10^{-5}$ |
| NU172                                |                 |                  |                                             |                                             |                                             |                                             |
| 1.0 $\mu\text{M}$                    | 162.6 $\pm$ 3.6 | 162.0 $\pm$ 3.3  | $3.3 \times 10^{-3} \pm 3.1 \times 10^{-4}$ | $2.0 \times 10^{-3} \pm 3.5 \times 10^{-4}$ | $2.1 \times 10^{-5} \pm 3.5 \times 10^{-6}$ | $1.9 \times 10^{-5} \pm 2.1 \times 10^{-6}$ |
| 2.0 $\mu\text{M}$                    | 268.1 $\pm$ 6.6 | 263.0 $\pm$ 11.5 | $2.4 \times 10^{-3} \pm 1.9 \times 10^{-4}$ | $1.3 \times 10^{-3} \pm 2.2 \times 10^{-4}$ | $1.2 \times 10^{-5} \pm 8.5 \times 10^{-7}$ | $1.3 \times 10^{-5} \pm 2.6 \times 10^{-6}$ |
| NU172+AD                             |                 |                  |                                             |                                             |                                             |                                             |
| 1.0 $\mu\text{M}$ +1.0 $\mu\text{M}$ | 63.8 $\pm$ 1.4  | 66.1 $\pm$ 3.4   | $3.0 \times 10^{-3} \pm 1.7 \times 10^{-4}$ | $3.3 \times 10^{-3} \pm 7.5 \times 10^{-4}$ | $5.6 \times 10^{-5} \pm 5.7 \times 10^{-6}$ | $7.1 \times 10^{-5} \pm 1.1 \times 10^{-5}$ |
| 2.0 $\mu\text{M}$ +1.0 $\mu\text{M}$ | 218.6 $\pm$ 7.3 | 215.7 $\pm$ 34.7 | $2.7 \times 10^{-3} \pm 2.4 \times 10^{-4}$ | $2.2 \times 10^{-3} \pm 4.6 \times 10^{-4}$ | $9.3 \times 10^{-6} \pm 3.4 \times 10^{-6}$ | $1.8 \times 10^{-5} \pm 2.0 \times 10^{-5}$ |
| NU172+NS_AD                          |                 |                  |                                             |                                             |                                             |                                             |
| 1.0 $\mu\text{M}$ +1.0 $\mu\text{M}$ | 187.3 $\pm$ 5.8 | 203.7 $\pm$ 15.8 | $2.6 \times 10^{-3} \pm 1.9 \times 10^{-4}$ | $2.7 \times 10^{-3} \pm 4.9 \times 10^{-4}$ | $8.9 \times 10^{-6} \pm 6.2 \times 10^{-6}$ | $1.9 \times 10^{-5} \pm 7.8 \times 10^{-6}$ |

<sup>1</sup>. clotting time (CT), viscous component ( $\eta'$ ), elastic component ( $\eta''$ ), the linear slope of the viscous or elastic component (m), thrombin aptamer (NU172), antidote (AD), nonsense antidote (NS\_AD).

**Table S3.** Heparinized blood was incubated with NaCl, NU172 aptamer, NS\_AD, or AD. After 2 min of incubation, the coagulation was activated with plasma cephalin and factor  $\text{X}_a$ . (n = 10). The measurement was performed with PIEZ and KC 1A. Using PIEZ, the clotting time (CT), viscous ( $\eta'$ ) and elastic ( $\eta''$ ) components at 300 s, and linear slopes ( $m(\eta')$  and  $m(\eta'')$ ) were measured <sup>1</sup>.

| Sample                  | PIEZ           | KC 1A          | PIEZ                                        |                                             |                                             |                                             |
|-------------------------|----------------|----------------|---------------------------------------------|---------------------------------------------|---------------------------------------------|---------------------------------------------|
|                         | CT/s           | CT/s           | $\eta'$ (Pa s) at 300 s                     | $\eta''$ (Pa s) at 300 s                    | $m(\eta'/\text{Pa})$                        | $m(\eta''/\text{Pa})$                       |
| NaCl                    | 45.1 $\pm$ 2.1 | 46.6 $\pm$ 2.3 | $4.6 \times 10^{-3} \pm 5.2 \times 10^{-4}$ | $4.6 \times 10^{-3} \pm 9.2 \times 10^{-4}$ | $4.0 \times 10^{-5} \pm 8.2 \times 10^{-6}$ | $3.8 \times 10^{-5} \pm 1.6 \times 10^{-5}$ |
| 1.0 $\mu\text{M}$ NU172 | 68.6 $\pm$ 3.4 | 71.7 $\pm$ 4.9 | $4.4 \times 10^{-3} \pm 8.4 \times 10^{-4}$ | $3.6 \times 10^{-3} \pm 8.0 \times 10^{-4}$ | $2.1 \times 10^{-5} \pm 1.4 \times 10^{-6}$ | $2.1 \times 10^{-5} \pm 5.5 \times 10^{-6}$ |
| 2.0 $\mu\text{M}$ NU172 | >600           | >600           | $1.9 \times 10^{-3} \pm 2.4 \times 10^{-4}$ | $5.4 \times 10^{-3} \pm 2.3 \times 10^{-4}$ | $3.4 \times 10^{-6} \pm 3.1 \times 10^{-6}$ | $1.1 \times 10^{-6} \pm 3.1 \times 10^{-5}$ |
| 1.0 $\mu\text{M}$ NS_AD | 47.0 $\pm$ 3.0 | 47.1 $\pm$ 1.3 | $5.6 \times 10^{-3} \pm 1.0 \times 10^{-3}$ | $6.0 \times 10^{-3} \pm 7.8 \times 10^{-4}$ | $2.8 \times 10^{-5} \pm 1.3 \times 10^{-5}$ | $4.9 \times 10^{-5} \pm 1.6 \times 10^{-5}$ |
| 1.0 $\mu\text{M}$ AD    | 46.2 $\pm$ 1.8 | 46.8 $\pm$ 1.3 | $4.5 \times 10^{-3} \pm 6.1 \times 10^{-4}$ | $5.8 \times 10^{-3} \pm 7.6 \times 10^{-4}$ | $3.0 \times 10^{-5} \pm 3.3 \times 10^{-6}$ | $4.3 \times 10^{-5} \pm 1.4 \times 10^{-5}$ |

<sup>1</sup>. clotting time (CT), viscous component ( $\eta'$ ), elastic component ( $\eta''$ ), the linear slope of the viscous or elastic component (m), thrombin aptamer (NU172), antidote (AD), nonsense antidote (NS\_AD)

**Table S4.** Heparinized blood was incubated for 2 min with 1.0  $\mu\text{M}$  NU172, then 1.0  $\mu\text{M}$  AD was added to the NU172 aptamer containing blood and incubated for 5 min. The clotting time (CT) was determined before and after the circulation for 30 min at 37  $^{\circ}\text{C}$  in an in vitro rotation model using PIEZ or KC 1A. Blood without any additives was indicated as a baseline. Blood with NaCl, 1.0  $\mu\text{M}$  NS\_AD, or AD were used as negative controls. Blood with 1.0  $\mu\text{M}$  NU172 served as positive control. Blood from five different volunteers was used ( $n = 5 \pm \text{SD}$ ). Using PIEZ, the clotting time (CT), viscous ( $\eta'$ ) and elastic ( $\eta''$ ) components at 300 s, and linear slopes ( $m(\eta')$  and  $m(\eta'')$ ) were measured <sup>1</sup>.

| Sample                                         | PIEZ           | KC 1A           | PIEZ                                        |                                             |                                             |                                             |
|------------------------------------------------|----------------|-----------------|---------------------------------------------|---------------------------------------------|---------------------------------------------|---------------------------------------------|
|                                                | CT/s           | CT/s            | $\eta'$ (Pa s) at 300 s                     | $\eta''$ (Pa s) at 300 s                    | $m(\eta'/\text{Pa})$                        | $m(\eta''/\text{Pa})$                       |
| <b>Baseline</b>                                | 45.9 $\pm$ 1.2 | 45.7 $\pm$ 2.0  | $8.1 \times 10^{-3} \pm 3.8 \times 10^{-3}$ | $1.2 \times 10^{-2} \pm 4.0 \times 10^{-3}$ | $5.7 \times 10^{-5} \pm 2.0 \times 10^{-5}$ | $3.4 \times 10^{-4} \pm 3.3 \times 10^{-4}$ |
| <b>0 min</b>                                   |                |                 |                                             |                                             |                                             |                                             |
| NaCl                                           | 45.5 $\pm$ 1.2 | 45.7 $\pm$ 2.0  | $5.7 \times 10^{-3} \pm 2.6 \times 10^{-4}$ | $9.4 \times 10^{-3} \pm 2.5 \times 10^{-3}$ | $4.8 \times 10^{-5} \pm 5.4 \times 10^{-6}$ | $1.8 \times 10^{-4} \pm 8.2 \times 10^{-5}$ |
| 1.0 $\mu\text{M}$ NS_AD                        | 47.6 $\pm$ 0.9 | 47.2 $\pm$ 1.8  | $8.2 \times 10^{-3} \pm 1.1 \times 10^{-3}$ | $1.0 \times 10^{-2} \pm 3.1 \times 10^{-3}$ | $8.9 \times 10^{-5} \pm 2.8 \times 10^{-5}$ | $2.7 \times 10^{-4} \pm 8.1 \times 10^{-5}$ |
| 1.0 $\mu\text{M}$ AD                           | 46.7 $\pm$ 1.3 | 47.7 $\pm$ 4.2  | $7.0 \times 10^{-3} \pm 3.6 \times 10^{-3}$ | $1.0 \times 10^{-2} \pm 5.5 \times 10^{-3}$ | $7.5 \times 10^{-5} \pm 5.2 \times 10^{-5}$ | $2.3 \times 10^{-4} \pm 1.6 \times 10^{-4}$ |
| 1.0 $\mu\text{M}$ NU172                        | > 600          | > 600           | $4.2 \times 10^{-3} \pm 5.6 \times 10^{-4}$ | $2.2 \times 10^{-3} \pm 9.0 \times 10^{-4}$ | $1.1 \times 10^{-5} \pm 3.2 \times 10^{-6}$ | $8.1 \times 10^{-6} \pm 1.9 \times 10^{-6}$ |
| 1.0 $\mu\text{M}$ NU172 + 1.0 $\mu\text{M}$ AD | 51.9 $\pm$ 4.6 | 57.9 $\pm$ 11.4 | $5.7 \times 10^{-3} \pm 4.6 \times 10^{-4}$ | $7.3 \times 10^{-3} \pm 7.7 \times 10^{-4}$ | $3.9 \times 10^{-5} \pm 2.0 \times 10^{-5}$ | $1.2 \times 10^{-4} \pm 7.2 \times 10^{-5}$ |
| <b>After 30 min</b>                            |                |                 |                                             |                                             |                                             |                                             |
| NaCl                                           | 45.3 $\pm$ 0.9 | 44.0 $\pm$ 4.2  | $4.5 \times 10^{-3} \pm 1.6 \times 10^{-3}$ | $6.7 \times 10^{-3} \pm 3.3 \times 10^{-3}$ | $3.1 \times 10^{-5} \pm 1.5 \times 10^{-5}$ | $8.7 \times 10^{-5} \pm 5.2 \times 10^{-5}$ |
| 1.0 $\mu\text{M}$ NS_AD                        | 47.7 $\pm$ 1.4 | 46.4 $\pm$ 1.2  | $6.1 \times 10^{-3} \pm 1.5 \times 10^{-3}$ | $8.3 \times 10^{-3} \pm 1.2 \times 10^{-3}$ | $5.2 \times 10^{-5} \pm 3.4 \times 10^{-5}$ | $1.4 \times 10^{-4} \pm 1.1 \times 10^{-4}$ |
| 1.0 $\mu\text{M}$ AD                           | 46.7 $\pm$ 1.6 | 45.3 $\pm$ 4.9  | $7.8 \times 10^{-3} \pm 3.4 \times 10^{-3}$ | $9.9 \times 10^{-3} \pm 4.4 \times 10^{-3}$ | $8.8 \times 10^{-5} \pm 6.0 \times 10^{-5}$ | $2.5 \times 10^{-4} \pm 1.6 \times 10^{-4}$ |
| 1.0 $\mu\text{M}$ NU172                        | > 600          | > 600           | $4.4 \times 10^{-3} \pm 5.5 \times 10^{-4}$ | $2.3 \times 10^{-2} \pm 9.9 \times 10^{-4}$ | $1.5 \times 10^{-5} \pm 2.6 \times 10^{-6}$ | $9.6 \times 10^{-6} \pm 2.4 \times 10^{-6}$ |
| 1.0 $\mu\text{M}$ NU172 + 1.0 $\mu\text{M}$ AD | 49.3 $\pm$ 2.0 | 61.6 $\pm$ 3.0  | $5.3 \times 10^{-3} \pm 1.4 \times 10^{-3}$ | $6.1 \times 10^{-3} \pm 1.0 \times 10^{-3}$ | $3.1 \times 10^{-5} \pm 1.4 \times 10^{-5}$ | $6.1 \times 10^{-5} \pm 5.2 \times 10^{-6}$ |

<sup>1</sup>. clotting time (CT), viscous component ( $\eta'$ ), elastic component ( $\eta''$ ), the linear slope of the visocus or elastic component (m), thrombin aptamer (NU172), antidote (AD), nonsense antidote (NS\_AD)

## Supplementary Figures

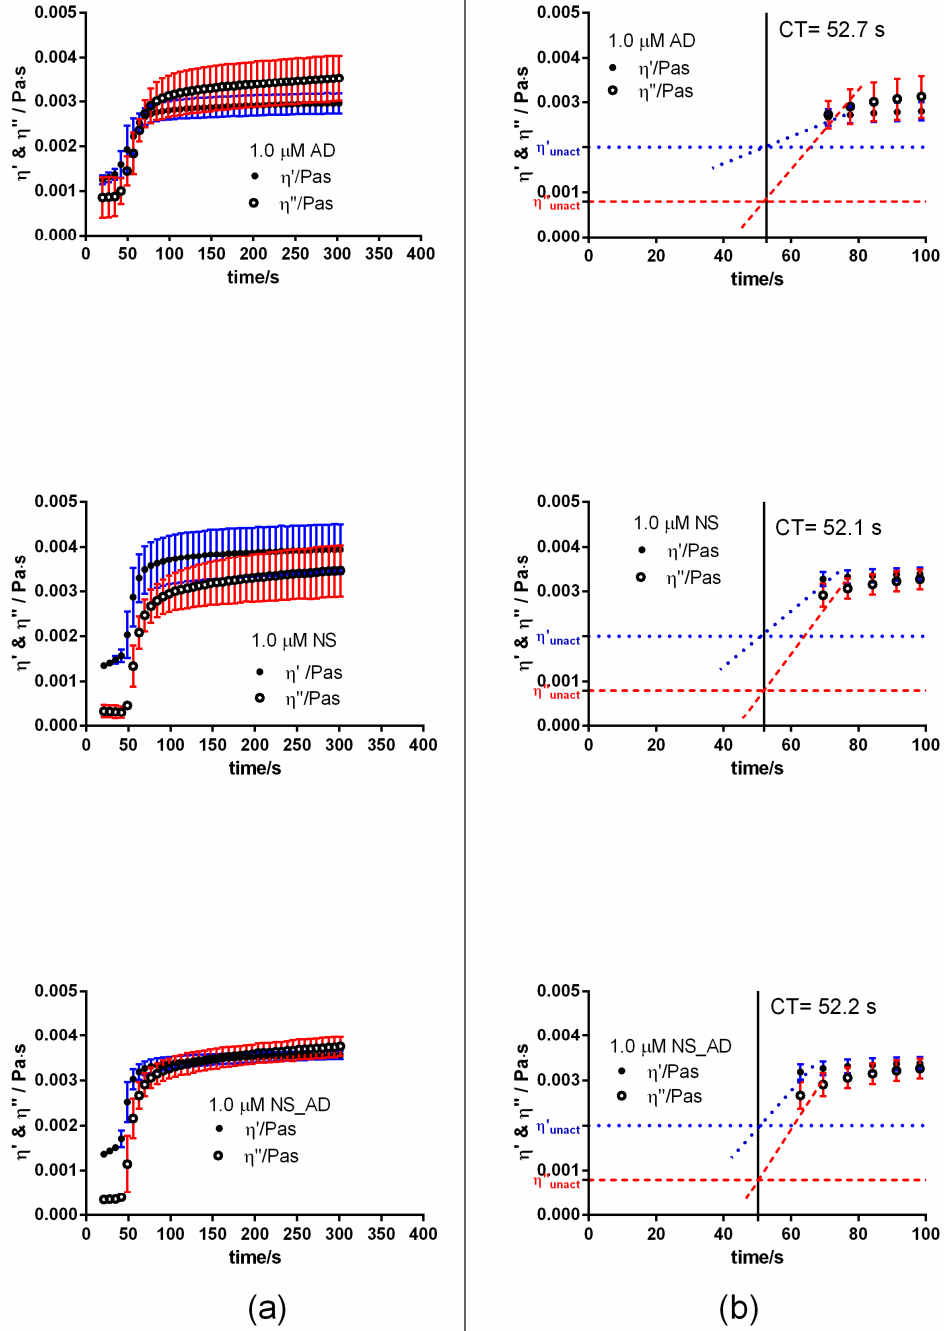

**Figure S1.** Detection of clotting time (CT) in citrated blood using PIEZ after the addition of 1.0  $\mu\text{M}$  AD, NS, or NS\_AD. (a) Detection of mean viscous ( $\eta'$ ) and elastic ( $\eta''$ ) components of blood at 100 Hz and 37  $^{\circ}\text{C}$  ( $n = 10 \pm \text{SD}$ ). (b) Enlarged parts of diagrams for the calculation of CT. The horizontal dotted blue line at 0.002 Pa·s visualizes the  $\eta'$  and the dashed red line at 0.0008 Pa·s visualizes the  $\eta''$  of unactivated citrated blood.

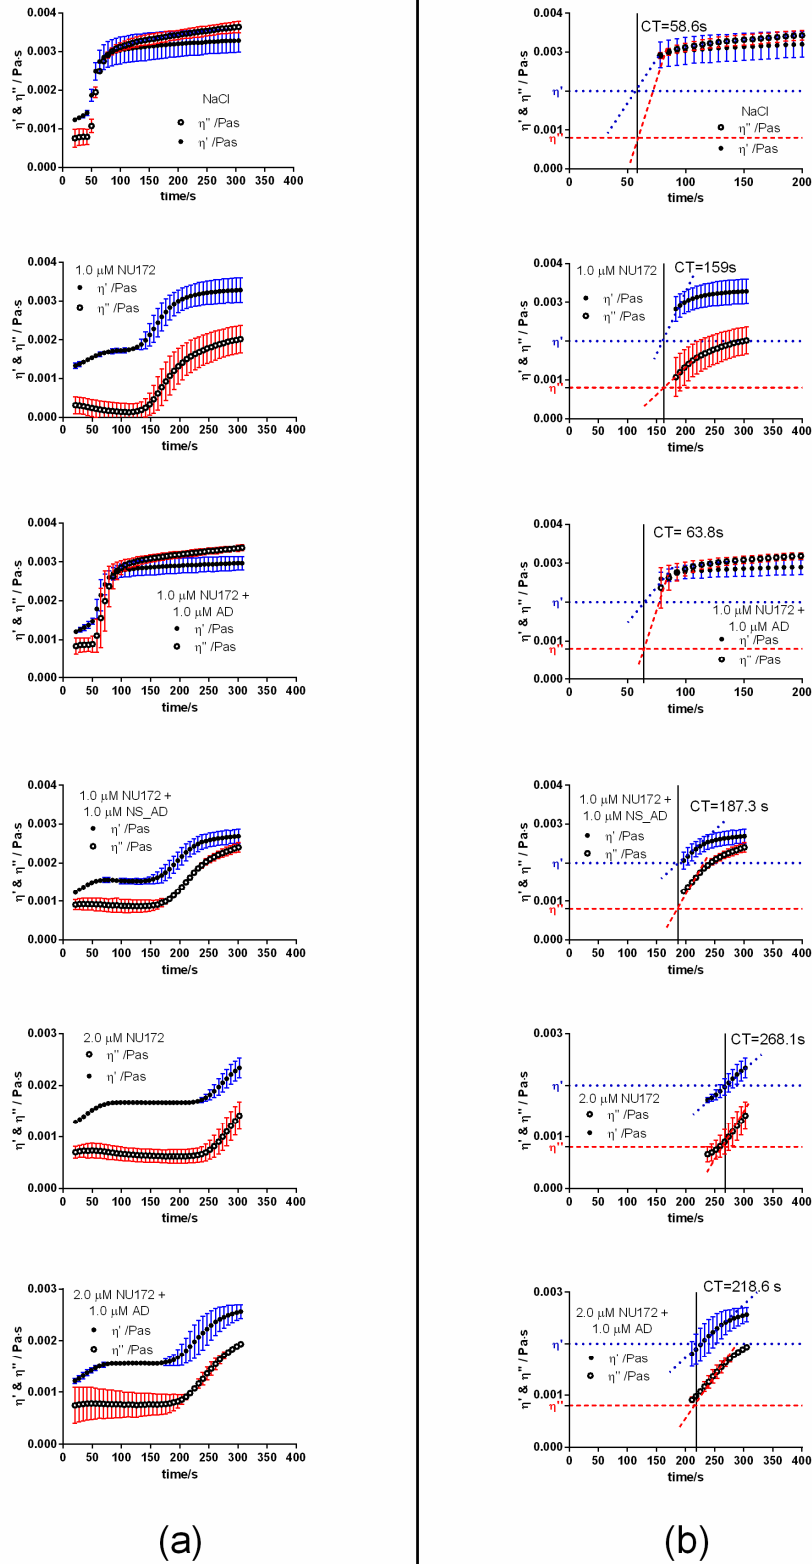

**Figure S2.** Detection of clotting time (CT) in citrated blood using PIEZ. After 2 min of incubation with 1.0 or 2.0  $\mu\text{M}$  NU172, 1.0  $\mu\text{M}$  AD or 1.0  $\mu\text{M}$  NS\_AD was added. Furthermore, CT was detected in blood containing NaCl, 1.0, or 2.0  $\mu\text{M}$  NU172. (a) Detection of mean viscous ( $\eta'$ ) and elastic ( $\eta''$ ) components of blood at 100 Hz and 37 °C ( $n = 5 \pm \text{SD}$ ). (b) Enlarged parts of diagrams for the calculation of CT. The horizontal dotted blue line at 0.002 Pa.s visualizes the  $\eta'$  and the dashed red line at 0.0008 Pa.s visualizes the  $\eta''$  of unactivated citrated blood.
